## Corrigendum

# The methyltransferase domain of dengue virus protein NS5 ensures efficient RNA synthesis initiation and elongation by the polymerase domain

Supanee Potisophon<sup>1,2</sup>, Stéphane Priet<sup>1,2</sup>, Axelle Collet<sup>1,2</sup>, Etienne Decroly<sup>1,2</sup>,  
Bruno Canard<sup>1,2,\*</sup> and Barbara Selisko<sup>1,2,\*</sup>

<sup>1</sup>Aix-Marseille Université, AFMB UMR 7257, 13288 Marseille, France and <sup>2</sup>CNRS, AFMB UMR 7257, 13288 Marseille, France

*Nucl. Acids Res.* 42 (18): 11642–11656. doi: 10.1093/nar/gku666

The authors wish to make the following corrections to Figure 1:

In the original figure, panels A and B were accidentally duplicated. A corrected Figure is provided below.

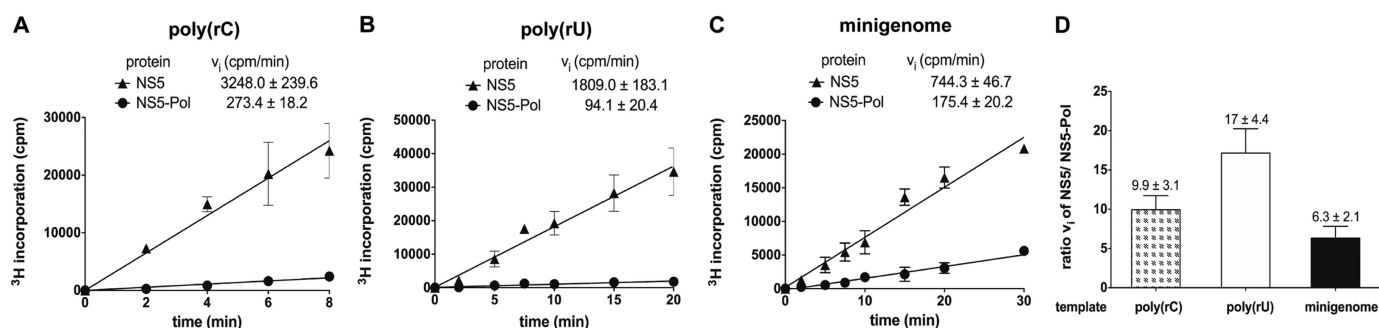

**Figure 1.** NS5 and NS5-Pol activity on homopolymeric and heteropolymeric templates analyzed by filter binding. Reactions kinetics were determined as given in Materials and Methods (RdRp assay 1). Reactions were done in HEPES reaction buffer with (A) 100 nM poly(rC), 40 nM protein, 20  $\mu$ M GTP, (B) 100 nM poly(rU), 100 nM protein, 200  $\mu$ M ATP, (C) 100 nM minigenome, 100 nM protein, 300  $\mu$ M ATP, CTP, GTP, 4  $\mu$ M UTP. Incorporation of <sup>3</sup>H-labeled NTPs was measured in counts per minute (cpm). (D) Ratios of NS5 and NS5-Pol activities are given for different RNA templates. The tests were done in triplicates.

The results and conclusion of the article are not affected and remain valid. The authors apologise to the readers for the inconvenience caused.

\*To whom correspondence should be addressed. Tel: +33 0491 828647; Fax: +33 0491 828646; Email: Barbara.Selisko@afmb.univ-mrs.fr  
Correspondence may also be addressed to Bruno Canard. Tel: +33 0491 828644; Fax: +33 0491 828646; Email: Bruno.Canard@afmb.univ-mrs.fr
